# Supplementary material for: Recurrent homozygous deletion of DROSHA and microduplication of PDE4DIP in pineoblastoma
Source: PubMed Central journal article supplement (PMC6054684; doi:10.1038/s41467-018-05029-3), 2018-07-20
Supplement: 41467_2018_5029_MOESM1_ESM.pdf [file 41467_2018_5029_MOESM1_ESM.pdf]

## Supplementary Figures and Tables

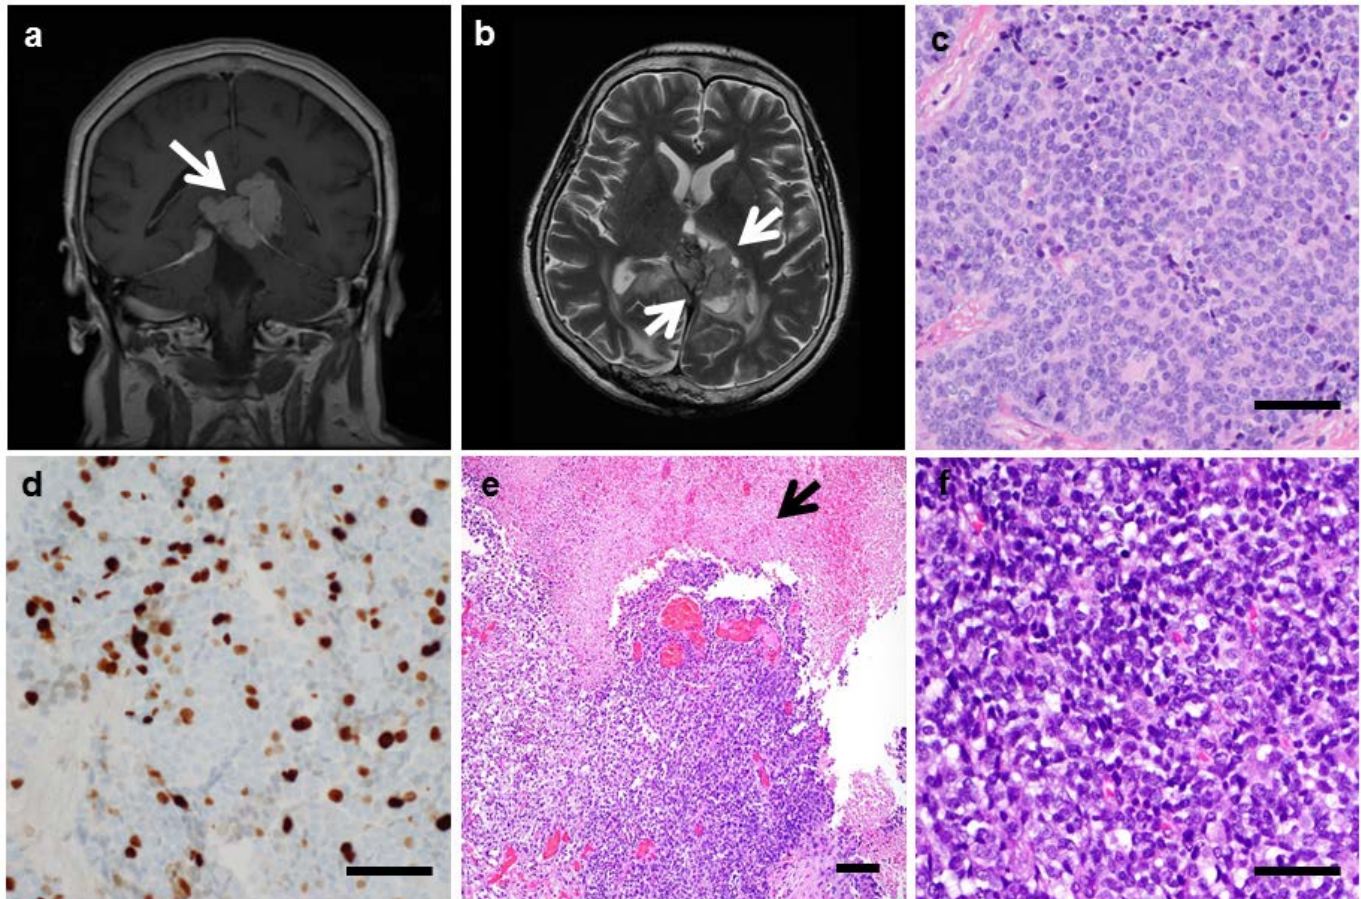

**Supplementary Figure 1:** Clinical and pathological features of adult pineoblastoma. Pineoblastomas of adults are indistinguishable from pediatric pineoblastoma by standard diagnostic methods. A 69-year-old woman presented with rapidly progressive visual loss resulting in blindness in both eyes. Her MRI scan at that time showed marked hydrocephalus and a pineal region mass, which was biopsied and diagnosed as pineoblastoma. (a,b) Preoperative MRI: coronal T1 post-contrast (a), axial T2 (b). Arrows indicate the tumor. (c): Hematoxylin and Eosin (H&E) section of the tumor at the time of diagnosis showed a classic pattern of primitive neuroectodermal tumor with sheets of small round blue cells. (d): Tumor showed brisk mitotic activity and high proliferation index highlighted by Ki-67. The patient underwent radiation therapy receiving 6000 cGy but progressed within 1 year and underwent second surgery with subtotal resection again showing pineoblastoma with areas of necrosis (e, arrow) and largely viable diffuse sheets of small round blue cells similar to the original tumor (f). The patient rapidly deteriorated and was referred to hospice care. Scale bar 100  $\mu$ m.

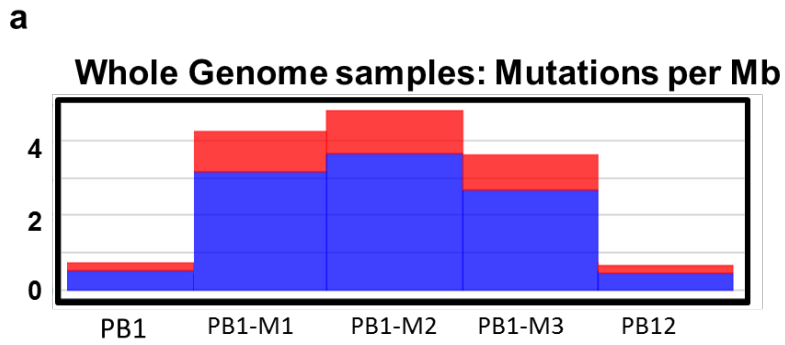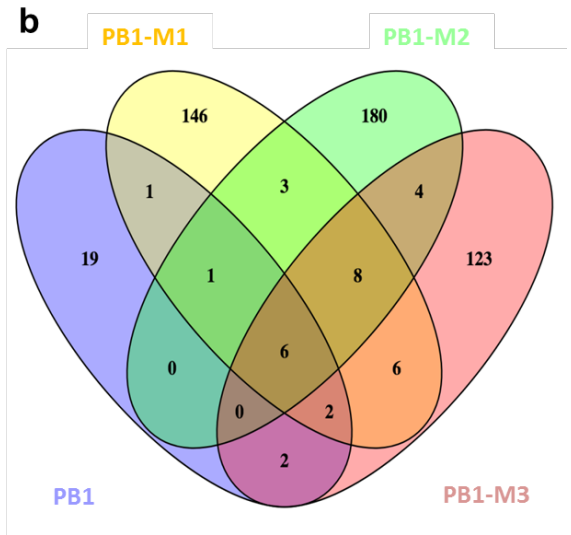

**Supplementary Figure 2:** Mutational burden in pineoblastoma: (a) WGS (matched Tumor and Germline). Somatic mutation rate in pineoblastomas (PB1 and PB12) is relatively low, similar to other pediatric cancers. (b) Venn diagram showing a comparison of somatic mutations shared among PB1 at the time of diagnosis and metastatic lesions collected at the time of autopsy shows markedly increase number of mutations in metastatic lesions (a and b). However, the patient underwent several cycles of chemotherapy and radiation, which may have contributed to increased mutation rate. Red: synonymous mutations, Blue: non-synonymous mutations

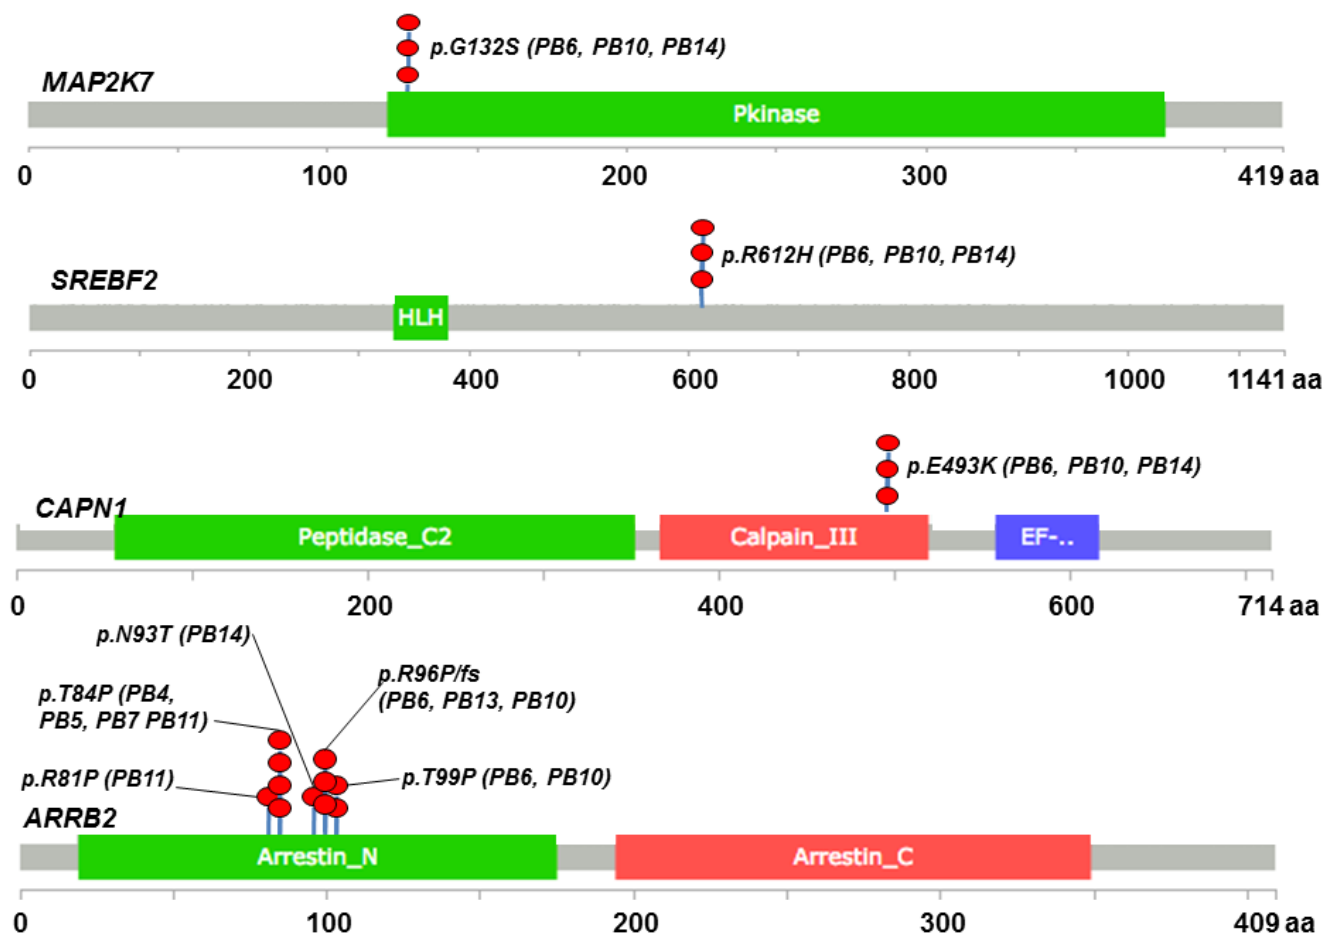

**Supplementary Figure 3:** Variants identified by WES in tumor only samples of pineoblastomas: *MAP2K7*, *SREBF2*, *CAPN1* and *ARRB2* were most commonly mutated genes in WES samples identified by pathway enrichment analysis. However, the lack of germline in these tumors precludes defining these variants as somatic mutations.

**a**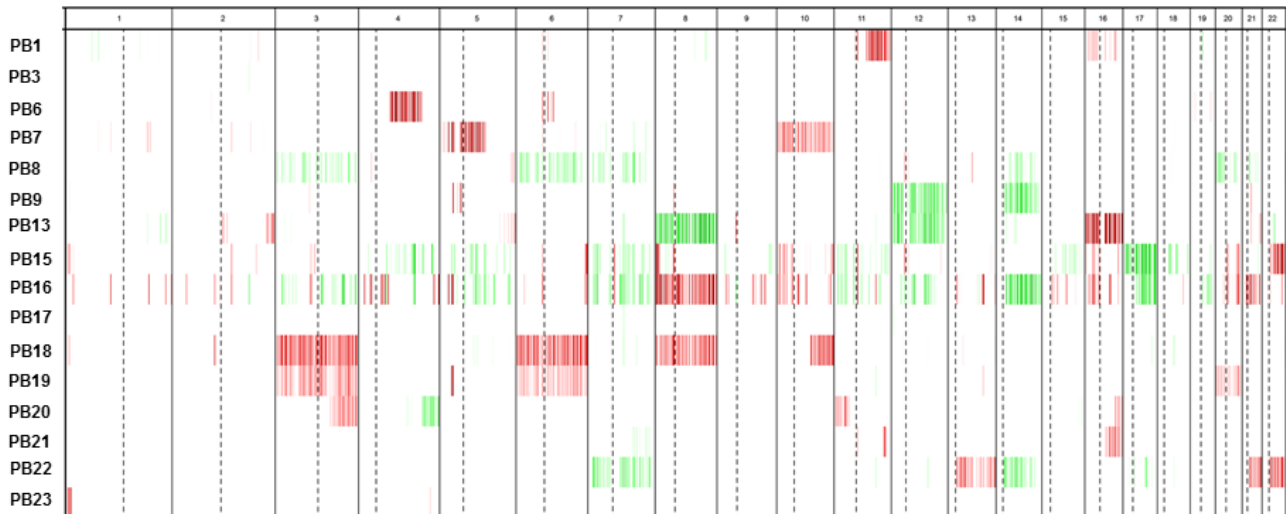**b**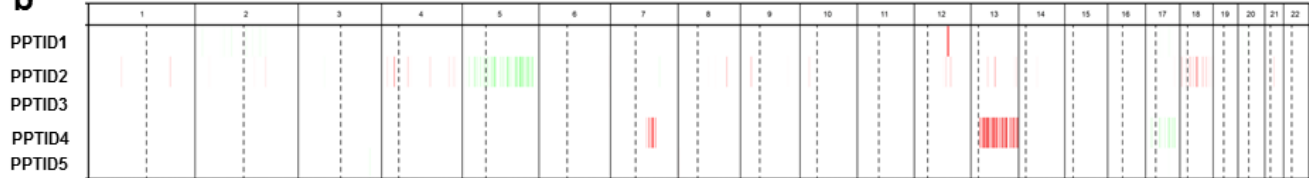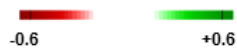

**Supplementary Figure 4:** Copy number landscape of pineoblastoma (PB) and pineal parenchymal tumor of intermediate differentiation (PPTID). Pineoblastomas showed random numerical abnormalities involving numerous chromosomes. In contrast, tumors that clustered with PPTID and adult PB (3, 8, and 23) showed fewer numerical aberrations.

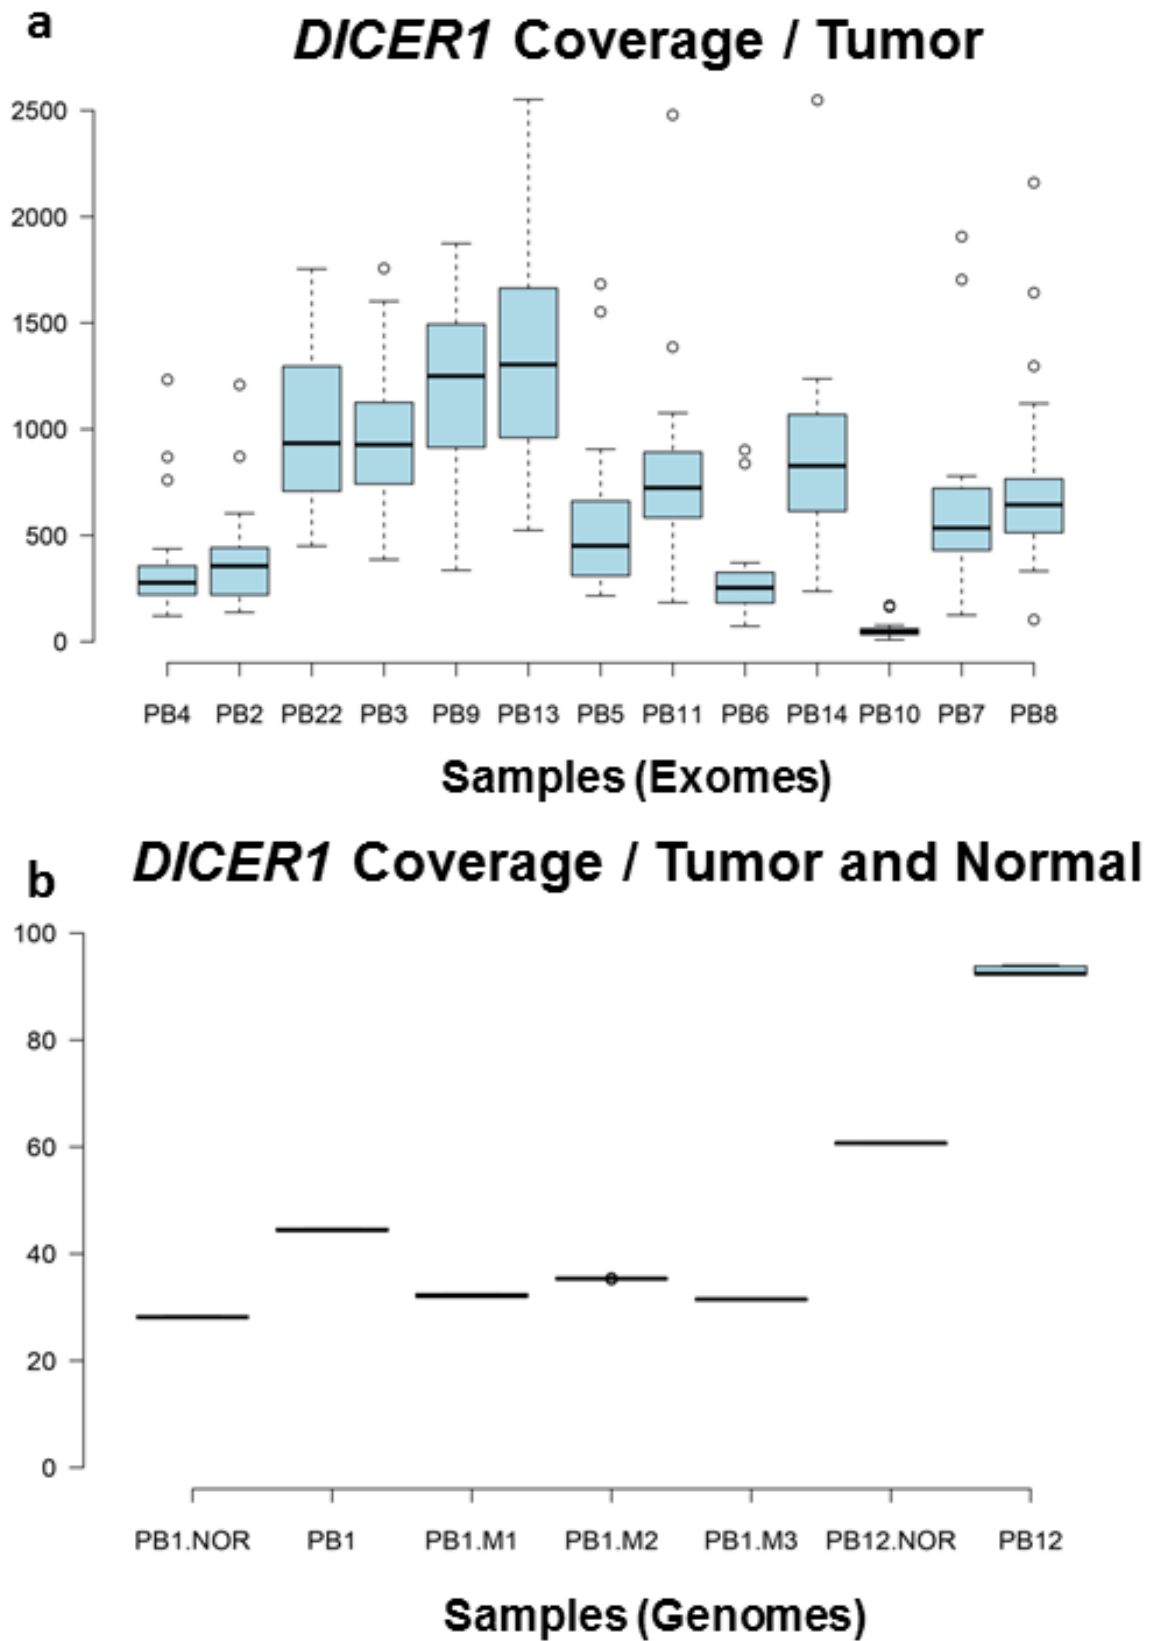

**Supplementary Figure 5:** Genomic sequencing coverage of *DICER1* in (a) WES samples and (b) WGS samples (NOR: matched normal germline). No mutations were identified in the *DICER1*.

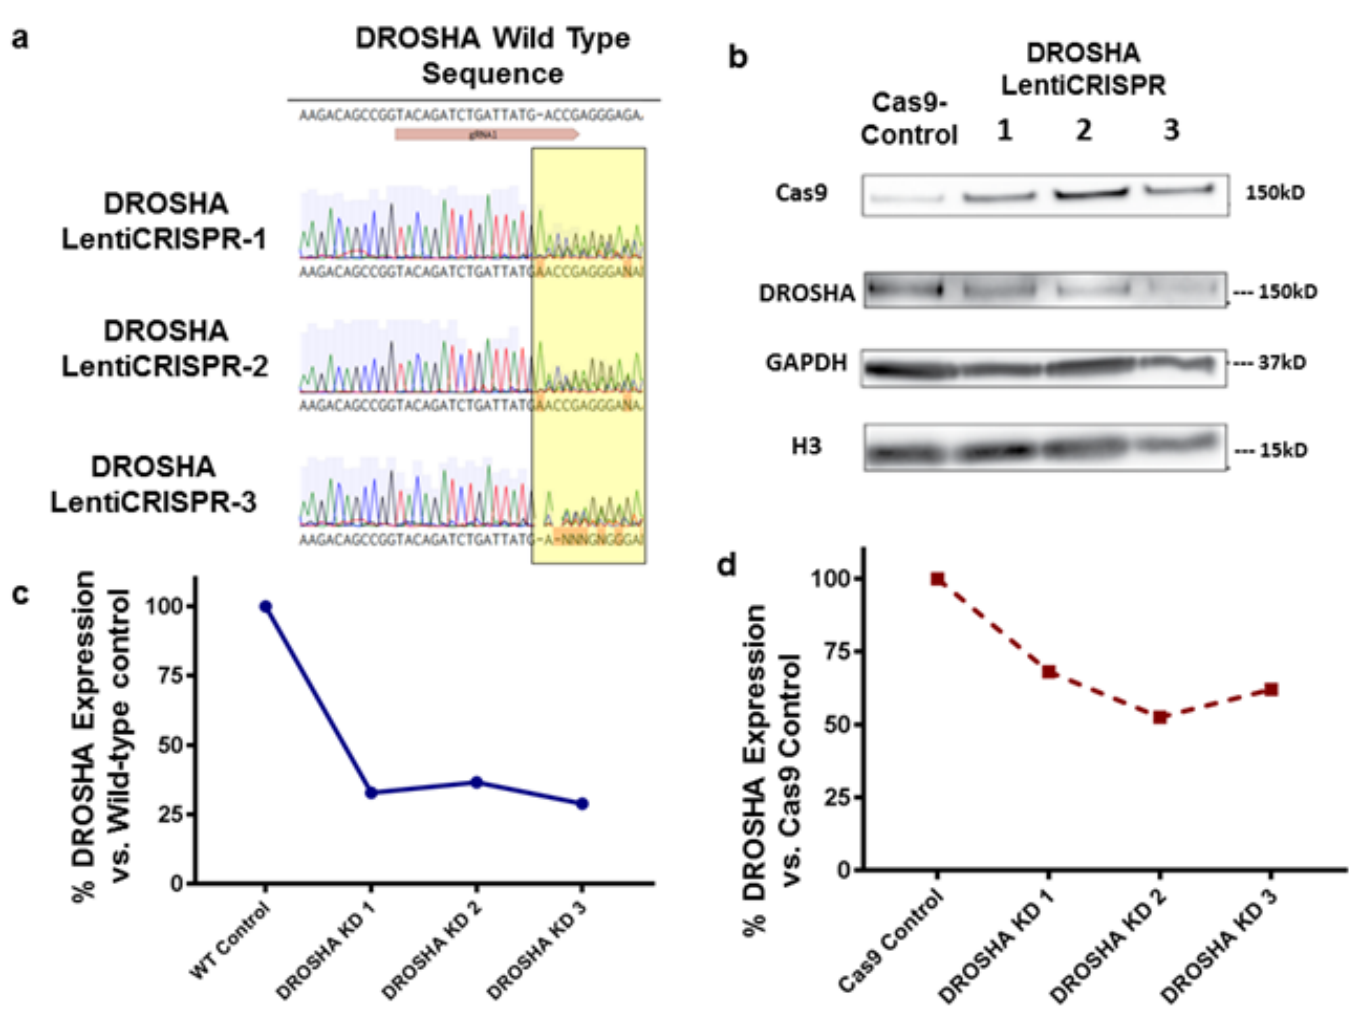

**Supplementary Figure 6:** CRISPR-targeting of *DROSHA* in hNSC lines: (a) Genetic confirmation of the CRISPR-mediated disruption of Exon 4 of the *DROSHA* locus: The wild-type sequence is shown at the top with the location of gRNA target below. Sanger sequencing is aligned to the wild-type template for each of the cell lines using Benchling Software. All *DROSHA* LentiCRISPR show mixed spectra beginning at a consistent location within the gRNA indicative of frameshift insertion/deletions at the locus disrupting the protein coding of *DROSHA* within the population. This corresponds to observed decrease of the *DROSHA* protein by western blot in (b) and Figure 5c. (c-d) Average band intensity in each lane was measured for *DROSHA*, GAPDH and Histone H3 using ImageJ Software. *DROSHA* intensity was normalized to the average of the GAPDH and H3 control band intensities. (c) The % *DROSHA* expression vs. wild-type (see Fig. 5c) was calculated for each of the LentiCRISPR cell lines revealing a robust reduction of ~70% of the *DROSHA* protein levels across cell lines.(d) In a separate experiment, a control hNSC cell line was generated containing the LentiCRISPR vector with a gRNA sequence that targets the Tomato locus (Cas9-Control) showing reduction of *DROSHA* protein, confirming that the decrease of *DROSHA* does not represent a nonspecific effect of the lentivirus infection.

| Gene   | CDNA         | AA Change    | Impact               | Sample | Exome/Genome | Chr   | Position  |
|--------|--------------|--------------|----------------------|--------|--------------|-------|-----------|
| ABCA2  | c.C5636T     | p.T1879I     | nonsynonymous SNV    | PB1-M2 | Genome       | chr9  | 139906196 |
| ABCD2  | c.C2084A     | p.T695K      | nonsynonymous SNV    | PB1-M2 | Genome       | chr12 | 39947853  |
| ACOT6  | c.G291T      | p.L97F       | nonsynonymous SNV    | PB1-M1 | Genome       | chr14 | 74086210  |
| ACOT6  | c.G291T      | p.L97F       | nonsynonymous SNV    | PB1-M2 | Genome       | chr14 | 74086210  |
| ACOT6  | c.G291T      | p.L97F       | nonsynonymous SNV    | PB1-M3 | Genome       | chr14 | 74086210  |
| AGO3   | c.A1012C     | p.T338P      | nonsynonymous SNV    | PB8    | Exome        | chr1  | 36474628  |
| ALPK2  | c.T2686G     | p.L896V      | nonsynonymous SNV    | PB1-M2 | Genome       | chr18 | 56204733  |
| ARID3A | c.418_420del | p.140_140del | inframe deletion     | PB10   | Exome        | chr19 | 932467    |
| ARID3A | c.C657A      | p.D219E      | nonsynonymous SNV    | PB5    | Exome        | chr19 | 932706    |
| ARRB2  | c.289dupC    | p.R96fs      | frameshift insertion | PB10   | Exome        | chr17 | 4619834   |
| ARRB2  | c.A250C      | p.T84P       | nonsynonymous SNV    | PB11   | Exome        | chr17 | 4619841   |
| ARRB2  | c.A250C      | p.T84P       | nonsynonymous SNV    | PB4    | Exome        | chr17 | 4619841   |
| ARRB2  | c.A250C      | p.T84P       | nonsynonymous SNV    | PB5    | Exome        | chr17 | 4619841   |
| ARRB2  | c.A250C      | p.T84P       | nonsynonymous SNV    | PB7    | Exome        | chr17 | 4619841   |
| ARRB2  | c.A278C      | p.N93T       | nonsynonymous SNV    | PB14   | Exome        | chr17 | 4619824   |
| ARRB2  | c.A295C      | p.T99P       | nonsynonymous SNV    | PB10   | Exome        | chr17 | 4619841   |
| ARRB2  | c.A295C      | p.T99P       | nonsynonymous SNV    | PB6    | Exome        | chr17 | 4619841   |
| ARRB2  | c.G242C      | p.R81P       | nonsynonymous SNV    | PB11   | Exome        | chr17 | 4619833   |
| ARRB2  | c.G287C      | p.R96P       | nonsynonymous SNV    | PB13   | Exome        | chr17 | 4619833   |

|          |            |           |                     |        |        |       |           |
|----------|------------|-----------|---------------------|--------|--------|-------|-----------|
| ARRB2    | c.G287C    | p.R96P    | nonsynonymous SNV   | PB6    | Exome  | chr17 | 4619833   |
| ASTL     | c.G1130A   | p.G377D   | nonsynonymous SNV   | PB1-M2 | Genome | chr2  | 96789755  |
| BARD1    | c.C1304T   | p.A435V   | nonsynonymous SNV   | PB4    | Exome  | chr2  | 215645294 |
| BDP1     | c.A5163T   | p.K1721N  | nonsynonymous SNV   | PB1-M2 | Genome | chr5  | 70818287  |
| BRF1     | c.A496T    | p.M166L   | nonsynonymous SNV   | PB3    | Exome  | chr14 | 105693045 |
| BTBD6    | c.C911T    | p.T304I   | nonsynonymous SNV   | PB7    | Exome  | chr14 | 105716462 |
| C12orf51 | c.G12471T  | p.E4157D  | nonsynonymous SNV   | PB1-M1 | Genome | chr12 | 112601370 |
| C12orf51 | c.C12785G  | p.S4262C  | nonsynonymous SNV   | PB1-M3 | Genome | chr12 | 112600261 |
| C5orf42  | c.T8925A   | p.S2975S  | synonymous SNV      | PB1-M1 | Genome | chr5  | 37121817  |
| C5orf42  | c.A8669G   | p.D2890G  | nonsynonymous SNV   | PB1-M2 | Genome | chr5  | 37125473  |
| CAPN1    | c.G1477A   | p.E493K   | nonsynonymous SNV   | PB10   | Exome  | chr11 | 64974057  |
| CAPN1    | c.G1477A   | p.E493K   | nonsynonymous SNV   | PB14   | Exome  | chr11 | 64974057  |
| CAPN1    | c.G1477A   | p.E493K   | nonsynonymous SNV   | PB6    | Exome  | chr11 | 64974057  |
| CHD8     | c.C3740T   | p.S1247F  | nonsynonymous SNV   | PB4    | Exome  | chr14 | 21868460  |
| CHD8     | c.6275delA | p.N2092fs | frameshift deletion | PB5    | Exome  | chr14 | 21859176  |
| CHD8     | c.C3820T   | p.R1274W  | nonsynonymous SNV   | PB8    | Exome  | chr14 | 21868380  |
| COL2A1   | c.C3134T   | p.P1045L  | nonsynonymous SNV   | PB1    | Genome | chr12 | 48371414  |
| COL2A1   | c.C3134T   | p.P1045L  | nonsynonymous SNV   | PB1-M1 | Genome | chr12 | 48371414  |
| COL2A1   | c.C3134T   | p.P1045L  | nonsynonymous SNV   | PB1-M2 | Genome | chr12 | 48371414  |
| COL2A1   | c.C3134T   | p.P1045L  | nonsynonymous SNV   | PB1-M3 | Genome | chr12 | 48371414  |



|         |                |                     |                      |        |        |       |               |
|---------|----------------|---------------------|----------------------|--------|--------|-------|---------------|
| CREBBP  | c.6645_6647del | p.2215_2216del<br>I | inframe deletion     | PB5    | Exome  | chr16 | 3778401       |
| CREBBP  | c.C6509T       | p.A2170V            | nonsynonymous<br>SNV | PB7    | Exome  | chr16 | 3778539       |
| CREBBP  | c.G2225C       | p.R742P             | nonsynonymous<br>SNV | PB8    | Exome  | chr16 | 3824628       |
| CREG1   | c.C83T         | p.P28L              | nonsynonymous<br>SNV | PB3    | Exome  | chr1  | 16752289<br>6 |
| CSMD2   | c.A5476G       | p.I1826V            | nonsynonymous<br>SNV | PB1-M3 | Genome | chr1  | 34090148      |
| CYP4F2  | c.C1448G       | p.A483G             | nonsynonymous<br>SNV | PB1-M2 | Genome | chr19 | 15989696      |
| CYSLTR1 | c.G25T         | p.V9L               | nonsynonymous<br>SNV | PB12   | Genome | chrX  | 77529219      |
| DCHS2   | c.T6734A       | p.I2245N            | nonsynonymous<br>SNV | PB1-M1 | Genome | chr4  | 15515770<br>5 |
| DCHS2   | c.T6734A       | p.I2245N            | nonsynonymous<br>SNV | PB1-M2 | Genome | chr4  | 15515770<br>5 |
| DCHS2   | c.T6734A       | p.I2245N            | nonsynonymous<br>SNV | PB1-M3 | Genome | chr4  | 15515770<br>5 |
| DDX17   | c.A1511G       | p.H504R             | nonsynonymous<br>SNV | PB3    | Exome  | chr22 | 38884057      |
| DNAH6   | c.A11467C      | p.N3823H            | nonsynonymous<br>SNV | PB1-M2 | Genome | chr2  | 85024768      |
| ECD     | c.C1094A       | p.P365H             | nonsynonymous<br>SNV | PB5    | Exome  | chr10 | 74899400      |
| EEF1A1  | c.G877A        | p.E293K             | nonsynonymous<br>SNV | PB13   | Exome  | chr6  | 74228229      |
| EEF1A1  | c.G943C        | p.V315L             | nonsynonymous<br>SNV | PB5    | Exome  | chr6  | 74228163      |
| ELN     | c.G2000C       | p.C667S             | nonsynonymous<br>SNV | PB1-M1 | Genome | chr7  | 73482996      |
| ELN     | c.G2141C       | p.C714S             | nonsynonymous<br>SNV | PB1-M3 | Genome | chr7  | 73482996      |
| ENPP2   | c.A1922T       | p.E641V             | nonsynonymous<br>SNV | PB1-M2 | Genome | chr8  | 12058160<br>6 |
| ERBB2IP | c.G2835C       | p.K945N             | nonsynonymous<br>SNV | PB2    | Exome  | chr5  | 65349981      |

|         |          |          |                   |        |        |       |               |
|---------|----------|----------|-------------------|--------|--------|-------|---------------|
| FBN1    | c.G4568A | p.R1523Q | nonsynonymous SNV | PB1    | Genome | chr15 | 48760623      |
| FCER1G  | c.G152A  | p.R51Q   | nonsynonymous SNV | PB7    | Exome  | chr1  | 16118804<br>1 |
| FGFR1   | c.C581T  | p.P194L  | nonsynonymous SNV | PB4    | Exome  | chr8  | 38282109      |
| FOS     | c.C510A  | p.D170E  | nonsynonymous SNV | PB5    | Exome  | chr14 | 75747494      |
| GATA1   | c.C1168T | p.P390S  | nonsynonymous SNV | PB7    | Exome  | chrX  | 48652497      |
| GHR     | c.T1196C | p.F399S  | nonsynonymous SNV | PB5    | Exome  | chr5  | 42718805      |
| GPAT2   | c.C2074T | p.R692C  | nonsynonymous SNV | PB1    | Genome | chr2  | 96688929      |
| GPX5    | c.T299A  | p.M100K  | nonsynonymous SNV | PB1    | Genome | chr6  | 28500155      |
| GPX5    | c.T299A  | p.M100K  | nonsynonymous SNV | PB1-M1 | Genome | chr6  | 28500155      |
| GPX5    | c.T299A  | p.M100K  | nonsynonymous SNV | PB1-M2 | Genome | chr6  | 28500155      |
| GPX5    | c.T299A  | p.M100K  | nonsynonymous SNV | PB1-M3 | Genome | chr6  | 28500155      |
| HBS1L   | c.G504C  | p.E168D  | nonsynonymous SNV | PB1-M3 | Genome | chr6  | 13531870<br>4 |
| HINT1   | c.C151T  | p.H51Y   | nonsynonymous SNV | PB4    | Exome  | chr5  | 13049833<br>0 |
| HLA-DRA | c.A119T  | p.N40I   | nonsynonymous SNV | PB1-M2 | Genome | chr6  | 32410261      |
| JARID2  | c.T1235A | p.F412Y  | nonsynonymous SNV | PB2    | Exome  | chr6  | 15497207      |
| JARID2  | c.G2164A | p.V722I  | nonsynonymous SNV | PB9    | Exome  | chr6  | 15507596      |
| KAT6A   | c.G4828A | p.A1610T | nonsynonymous SNV | PB10   | Exome  | chr8  | 41790910      |
| KAT6A   | c.T1195C | p.S399P  | nonsynonymous SNV | PB2    | Exome  | chr8  | 41834694      |
| KAT6A   | c.T1193C | p.V398A  | nonsynonymous SNV | PB2    | Exome  | chr8  | 41834696      |

|            |          |         |                   |        |        |       |           |
|------------|----------|---------|-------------------|--------|--------|-------|-----------|
| KCNA5      | c.C355A  | p.H119N | nonsynonymous SNV | PB1-M2 | Genome | chr12 | 5153668   |
| KCNN4      | c.C1084T | p.R362W | nonsynonymous SNV | PB12   | Genome | chr19 | 44273150  |
| KRTAP4-4   | c.T202C  | p.S68P  | nonsynonymous SNV | PB1-M2 | Genome | chr17 | 39316742  |
| LIG1       | c.G2143T | p.V715L | nonsynonymous SNV | PB1    | Genome | chr19 | 48626437  |
| LY75-CD302 | c.A2411G | p.Y804C | nonsynonymous SNV | PB1-M2 | Genome | chr2  | 160711423 |
| MAP2K7     | c.G394A  | p.G132S | nonsynonymous SNV | PB10   | Exome  | chr19 | 7975205   |
| MAP2K7     | c.G394A  | p.G132S | nonsynonymous SNV | PB14   | Exome  | chr19 | 7975205   |
| MAP2K7     | c.G394A  | p.G132S | nonsynonymous SNV | PB6    | Exome  | chr19 | 7975205   |
| MGLL       | c.C187T  | p.R63W  | nonsynonymous SNV | PB1    | Genome | chr3  | 127500677 |
| MGLL       | c.C187T  | p.R63W  | nonsynonymous SNV | PB1-M1 | Genome | chr3  | 127500677 |
| MGLL       | c.C187T  | p.R63W  | nonsynonymous SNV | PB1-M2 | Genome | chr3  | 127500677 |
| MGLL       | c.C187T  | p.R63W  | nonsynonymous SNV | PB1-M3 | Genome | chr3  | 127500677 |
| MUC13      | c.G1177A | p.G393S | nonsynonymous SNV | PB13   | Exome  | chr3  | 124631992 |
| MYH3       | c.A1529T | p.D510V | nonsynonymous SNV | PB1-M1 | Genome | chr17 | 10546195  |
| MYH3       | c.A1529T | p.D510V | nonsynonymous SNV | PB1-M3 | Genome | chr17 | 10546195  |
| MYO3A      | c.T2975C | p.I992T | nonsynonymous SNV | PB1-M2 | Genome | chr10 | 26446420  |
| NBPF14     | c.G319A  | p.V107I | nonsynonymous SNV | PB1-M1 | Genome | chr1  | 148023637 |
| NFAT5      | c.T1250C | p.I417T | nonsynonymous SNV | PB3    | Exome  | chr16 | 69693683  |
| NFKB2      | c.C1787A | p.P596H | nonsynonymous SNV | PB3    | Exome  | chr10 | 104160237 |

|              |          |         |                   |        |        |       |           |
|--------------|----------|---------|-------------------|--------|--------|-------|-----------|
| NFKB2        | c.C1786T | p.P596S | nonsynonymous SNV | PB3    | Exome  | chr10 | 104160236 |
| NFKB2        | c.C760A  | p.Q254K | nonsynonymous SNV | PB4    | Exome  | chr10 | 104157836 |
| OR1D5        | c.T353C  | p.M118T | nonsynonymous SNV | PB1    | Genome | chr17 | 2966549   |
| OR52H1       | c.G586T  | p.A196S | nonsynonymous SNV | PB1    | Genome | chr11 | 5566168   |
| POU1F1       | c.T686A  | p.L229Q | nonsynonymous SNV | PB1-M2 | Genome | chr3  | 87309234  |
| POU6F1       | c.C335G  | p.S112C | nonsynonymous SNV | PB1-M2 | Genome | chr12 | 51586169  |
| PPP1CC       | c.A725C  | p.D242A | nonsynonymous SNV | PB2    | Exome  | chr12 | 111160299 |
| PRAMEF1<br>1 | c.G683A  | p.R228H | nonsynonymous SNV | PB1-M2 | Genome | chr1  | 12887174  |
| PRKCD        | c.G1444A | p.D482N | nonsynonymous SNV | PB4    | Exome  | chr3  | 53222764  |
| PSMC4        | c.A242C  | p.Y81S  | nonsynonymous SNV | PB11   | Exome  | chr19 | 40480213  |
| PTEN         | c.A45T   | p.R15S  | nonsynonymous SNV | PB2    | Exome  | chr10 | 89624271  |
| PTK2B        | c.T1316C | p.V439A | nonsynonymous SNV | PB1    | Genome | chr8  | 27293840  |
| PTK2B        | c.T1316C | p.V439A | nonsynonymous SNV | PB1-M3 | Genome | chr8  | 27293840  |
| RASA3        | c.C1658T | p.A553V | nonsynonymous SNV | PB1    | Genome | chr13 | 114774873 |
| RASSF1       | c.T515C  | p.L172P | nonsynonymous SNV | PB3    | Exome  | chr3  | 50369247  |
| RBBP6        | c.C2275T | p.R759C | nonsynonymous SNV | PB2    | Exome  | chr16 | 24580388  |
| RDBP         | c.G661A  | p.D221N | nonsynonymous SNV | PB1-M1 | Genome | chr6  | 31922413  |
| RDBP         | c.A662T  | p.D221V | nonsynonymous SNV | PB1-M1 | Genome | chr6  | 31922412  |
| RDBP         | c.G661A  | p.D221N | nonsynonymous SNV | PB1-M2 | Genome | chr6  | 31922413  |

|          |          |          |                   |        |        |       |           |
|----------|----------|----------|-------------------|--------|--------|-------|-----------|
| RDBP     | c.A662T  | p.D221V  | nonsynonymous SNV | PB1-M2 | Genome | chr6  | 31922412  |
| RDH16    | c.C225A  | p.D75E   | nonsynonymous SNV | PB1-M2 | Genome | chr12 | 57351022  |
| SALL3    | c.G1717A | p.V573M  | nonsynonymous SNV | PB1    | Genome | chr18 | 76753708  |
| SERPINB5 | c.C1095A | p.N365K  | nonsynonymous SNV | PB2    | Exome  | chr18 | 61170922  |
| SETD8    | c.C85A   | p.P29T   | nonsynonymous SNV | PB5    | Exome  | chr12 | 123874054 |
| SLC38A10 | c.A1931G | p.E644G  | nonsynonymous SNV | PB1-M2 | Genome | chr17 | 79226009  |
| SP110    | c.T2034A | p.H678Q  | nonsynonymous SNV | PB11   | Exome  | chr2  | 231033876 |
| SREBF2   | c.G1835A | p.R612H  | nonsynonymous SNV | PB10   | Exome  | chr22 | 42276793  |
| SREBF2   | c.G1835A | p.R612H  | nonsynonymous SNV | PB14   | Exome  | chr22 | 42276793  |
| SREBF2   | c.G1835A | p.R612H  | nonsynonymous SNV | PB6    | Exome  | chr22 | 42276793  |
| TCF4     | c.C460G  | p.P154A  | nonsynonymous SNV | PB2    | Exome  | chr18 | 53018138  |
| TCF7L2   | c.C1549T | p.L517F  | nonsynonymous SNV | PB2    | Exome  | chr10 | 114925540 |
| TET1     | c.T4973G | p.F1658C | nonsynonymous SNV | PB1-M1 | Genome | chr10 | 70442651  |
| TET1     | c.T4973G | p.F1658C | nonsynonymous SNV | PB1-M2 | Genome | chr10 | 70442651  |
| TET1     | c.T4973G | p.F1658C | nonsynonymous SNV | PB1-M3 | Genome | chr10 | 70442651  |
| TGFBR1   | c.G974T  | p.G325V  | nonsynonymous SNV | PB5    | Exome  | chr9  | 101907014 |
| TOP2B    | c.G79C   | p.A27P   | nonsynonymous SNV | PB1-M2 | Genome | chr3  | 25686937  |
| TRH      | c.T373C  | p.W125R  | nonsynonymous SNV | PB9    | Exome  | chr3  | 129695703 |
| TSHZ3    | c.G1288A | p.V430I  | nonsynonymous SNV | PB12   | Genome | chr19 | 31769411  |

|         |           |           |                   |        |        |       |           |
|---------|-----------|-----------|-------------------|--------|--------|-------|-----------|
| TTN     | c.T43647G | p.S14549R | nonsynonymous SNV | PB1-M2 | Genome | chr2  | 179440017 |
| TXLNA   | c.C821A   | p.T274N   | nonsynonymous SNV | PB1-M2 | Genome | chr1  | 32655708  |
| VTN     | c.C634T   | p.R212C   | nonsynonymous SNV | PB5    | Exome  | chr17 | 26696345  |
| XRCC6   | c.T117G   | p.I39M    | nonsynonymous SNV | PB9    | Exome  | chr22 | 42024156  |
| ZDHHC11 | c.C908A   | p.A303D   | nonsynonymous SNV | PB1-M1 | Genome | chr5  | 833915    |
| ZNF292  | c.G7202A  | p.S2401N  | nonsynonymous SNV | PB1-M3 | Genome | chr6  | 87970549  |
| ZNF583  | c.T268C   | p.S90P    | nonsynonymous SNV | PB1-M2 | Genome | chr19 | 56934295  |
| ZNF789  | c.C1186A  | p.P396T   | nonsynonymous SNV | PB1-M1 | Genome | chr7  | 99085019  |
| ZNF789  | c.C1186A  | p.P396T   | nonsynonymous SNV | PB1-M2 | Genome | chr7  | 99085019  |
| ZNF789  | c.C1186A  | p.P396T   | nonsynonymous SNV | PB1-M3 | Genome | chr7  | 99085019  |
| ZNF8    | c.T443A   | p.L148Q   | nonsynonymous SNV | PB1-M2 | Genome | chr19 | 58805617  |

**Supplementary Table 1.** Mutations identified by WES and WGS in pineoblastoma samples.

| <b>gene</b>   | <b>baseMean</b> | <b>log2FC</b> | <b>pvalue</b> | <b>padj</b>  |
|---------------|-----------------|---------------|---------------|--------------|
| CACNA1E       | 7812.5          | 7.70          | 0.0000000000  | 0.0000000000 |
| CTCF          | 3547.3          | -8.07         | 0.0000000000  | 0.0000000000 |
| TXLNG2P       | 1933.9          | -7.96         | 0.0000000000  | 0.0000000000 |
| TMEM132D      | 796             | 7.58          | 0.0000000000  | 0.0000000000 |
| RPS4Y1        | 3286.4          | -7.12         | 0.0000000000  | 0.0000000000 |
| SKOR1         | 3809.3          | 6.95          | 0.0000000000  | 0.0000000000 |
| CTD-2281M20.1 | 2129.2          | -7.08         | 0.0000000000  | 0.0000000000 |
| BHLHE41       | 717.7           | 7.61          | 0.0000000000  | 0.0000000000 |
| TMEM26        | 505             | 7.49          | 0.0000000000  | 0.0000000000 |
| IGF2BP1       | 1683.9          | -7.64         | 0.0000000000  | 0.0000000000 |
| GPR155        | 1312.3          | 6.58          | 0.0000000000  | 0.0000000000 |
| CA10          | 2895.6          | -6.59         | 0.0000000000  | 0.0000000000 |
| USP9Y         | 1455.8          | -6.58         | 0.0000000000  | 0.0000000000 |
| KDM5D         | 1366.7          | -6.60         | 0.0000000000  | 0.0000000000 |
| MAGEC1        | 848.3           | -8.32         | 0.0000000000  | 0.0000000000 |
| DDX3Y         | 1995.2          | -6.29         | 0.0000000000  | 0.0000000000 |
| PPEF1         | 1716            | -6.71         | 0.0000000000  | 0.0000000000 |
| UTY           | 882.1           | -6.97         | 0.0000000000  | 0.0000000000 |
| NNAT          | 816.5           | -7.70         | 0.0000000000  | 0.0000000000 |
| ATOX8         | 441.9           | 6.41          | 0.0000000000  | 0.0000000000 |
| RBM46         | 950.3           | -6.49         | 0.0000000000  | 0.0000000000 |
| LRRC7         | 1256.1          | -6.33         | 0.0000000000  | 0.0000000000 |
| RP11-343H5.4  | 1092.6          | -6.83         | 0.0000000000  | 0.0000000000 |
| TTY15         | 566.6           | -6.95         | 0.0000000000  | 0.0000000000 |
| PTCSC3        | 175.7           | 7.76          | 0.0000000000  | 0.0000000000 |
| ADM           | 1054.9          | 5.74          | 0.0000000000  | 0.0000000000 |

|                  |        |       |              |              |
|------------------|--------|-------|--------------|--------------|
| CA12             | 1612.5 | 6.85  | 0.0000000000 | 0.0000000000 |
| TPTEP1           | 385.8  | 6.10  | 0.0000000000 | 0.0000000000 |
| FOXA2            | 154.3  | 8.13  | 0.0000000000 | 0.0000000000 |
| NAP1L5           | 266.4  | 6.57  | 0.0000000000 | 0.0000000000 |
| GALR1            | 162    | 7.34  | 0.0000000000 | 0.0000000001 |
| HIST1H4L         | 393    | 6.60  | 0.0000000000 | 0.0000000001 |
| RP11-767I20.1    | 146.6  | 7.57  | 0.0000000000 | 0.0000000001 |
| MAGEA6           | 403.7  | -7.48 | 0.0000000000 | 0.0000000001 |
| HIST1H2BJ        | 874.1  | 5.90  | 0.0000000000 | 0.0000000001 |
| DPEP3            | 814.6  | -7.02 | 0.0000000000 | 0.0000000001 |
| TPRX1            | 391.1  | -6.89 | 0.0000000000 | 0.0000000002 |
| RSPO1            | 419.6  | -6.57 | 0.0000000000 | 0.0000000002 |
| STRIP2           | 3805.8 | 5.30  | 0.0000000000 | 0.0000000002 |
| HIST1H2BE        | 616.4  | 6.16  | 0.0000000000 | 0.0000000003 |
| XIST             | 547    | 6.12  | 0.0000000000 | 0.0000000004 |
| RP11-742N3.1     | 317.9  | 5.82  | 0.0000000000 | 0.0000000005 |
| MAGEA3           | 344.8  | -7.28 | 0.0000000000 | 0.0000000005 |
| RP11-313J2.1     | 441.4  | -6.07 | 0.0000000000 | 0.0000000007 |
| PTHLH            | 1351.6 | 6.89  | 0.0000000000 | 0.0000000007 |
| DACT2            | 136.6  | 7.10  | 0.0000000000 | 0.0000000007 |
| LINC00261        | 118.2  | 7.75  | 0.0000000000 | 0.0000000007 |
| GP2              | 115.4  | 7.72  | 0.0000000000 | 0.0000000009 |
| RP11-453F18__B.1 | 1034.3 | -5.29 | 0.0000000000 | 0.0000000010 |
| GFAP             | 609.8  | 5.98  | 0.0000000000 | 0.0000000010 |
| KCNC2            | 818.5  | -5.36 | 0.0000000000 | 0.0000000018 |
| HMOX1            | 1374.1 | 5.13  | 0.0000000000 | 0.0000000019 |
| XAGE5            | 108.3  | 7.62  | 0.0000000000 | 0.0000000019 |
| CNTNAP4          | 1104   | -6.78 | 0.0000000000 | 0.0000000023 |



|               |        |       |              |              |
|---------------|--------|-------|--------------|--------------|
| BAI3          | 1655.6 | -5.02 | 0.0000000000 | 0.0000000025 |
| PCDH8         | 454    | 5.80  | 0.0000000000 | 0.0000000028 |
| HIST1H2AG     | 1128.7 | 5.82  | 0.0000000000 | 0.0000000030 |
| LECT1         | 1973.4 | 6.67  | 0.0000000000 | 0.0000000047 |
| CACNG4        | 819.9  | -5.45 | 0.0000000000 | 0.0000000067 |
| CES1          | 311.8  | 5.43  | 0.0000000000 | 0.0000000072 |
| IGF2BP3       | 363.6  | 5.59  | 0.0000000000 | 0.0000000076 |
| GLDC          | 965.1  | -5.12 | 0.0000000000 | 0.0000000078 |
| SDR42E1       | 94     | 7.42  | 0.0000000000 | 0.0000000097 |
| KCNQ2         | 521.9  | -5.42 | 0.0000000000 | 0.0000000105 |
| HTR1A         | 842.7  | -6.69 | 0.0000000000 | 0.0000000110 |
| CTD-2303H24.2 | 216.9  | 5.55  | 0.0000000000 | 0.0000000124 |
| FOXR2         | 257.5  | -6.34 | 0.0000000001 | 0.0000000214 |
| DDX43         | 247    | -6.29 | 0.0000000001 | 0.0000000288 |
| CCDC39        | 261.3  | -6.79 | 0.0000000001 | 0.0000000335 |
| CCDC172       | 257.9  | 5.62  | 0.0000000001 | 0.0000000410 |
| NLGN4Y        | 290.5  | -5.76 | 0.0000000001 | 0.0000000410 |
| SRD5A2        | 284.6  | 5.91  | 0.0000000001 | 0.0000000410 |
| KCNH7         | 260.1  | -5.94 | 0.0000000002 | 0.0000000490 |
| AC018890.6    | 108.7  | 6.45  | 0.0000000002 | 0.0000000503 |
| ARL4D         | 7085.1 | 4.45  | 0.0000000002 | 0.0000000523 |
| DROSHA        | 2190.6 | -4.81 | 0.0000000002 | 0.0000000613 |
| HIST1H2AH     | 401.3  | 5.65  | 0.0000000002 | 0.0000000627 |
| SETD7         | 2541   | 4.98  | 0.0000000002 | 0.0000000630 |
| HS3ST5        | 285.3  | -5.72 | 0.0000000003 | 0.0000000653 |
| SYNDIG1L      | 222.4  | 5.43  | 0.0000000003 | 0.0000000694 |
| GPR37         | 585.6  | 5.60  | 0.0000000003 | 0.0000000812 |
| MMP7          | 126.2  | 6.20  | 0.0000000004 | 0.0000000873 |

|              |        |       |              |              |
|--------------|--------|-------|--------------|--------------|
| SPAG17       | 649.8  | -5.43 | 0.0000000004 | 0.0000000880 |
| RP11-56A10.1 | 222.8  | 5.20  | 0.0000000004 | 0.0000000913 |
| UGT3A1       | 602.1  | -6.55 | 0.0000000004 | 0.0000000978 |
| C1orf132     | 3349.9 | 4.65  | 0.0000000005 | 0.0000001132 |
| RNF152       | 2168.9 | 4.44  | 0.0000000005 | 0.0000001226 |
| TFCP2L1      | 282.9  | 4.91  | 0.0000000006 | 0.0000001451 |
| LSR          | 267.2  | 4.98  | 0.0000000007 | 0.0000001644 |
| DCT          | 6038.7 | -4.32 | 0.0000000009 | 0.0000001889 |
| AC005863.1   | 363.5  | -5.64 | 0.0000000009 | 0.0000001889 |
| PAGE5        | 304.9  | -6.59 | 0.0000000011 | 0.0000002256 |
| HIST1H4F     | 354.8  | 5.21  | 0.0000000011 | 0.0000002327 |
| RP11-3N2.13  | 220.5  | -6.06 | 0.0000000011 | 0.0000002327 |
| RN7SL5P      | 3930   | 4.73  | 0.0000000013 | 0.0000002604 |
| NUTM2A-AS1   | 221    | -5.71 | 0.0000000015 | 0.0000002982 |
| CABP2        | 405.3  | -6.28 | 0.0000000017 | 0.0000003456 |
| FBN3         | 296.6  | -5.28 | 0.0000000018 | 0.0000003569 |
| NEGR1        | 1177.4 | -4.53 | 0.0000000019 | 0.0000003827 |
| GFRA1        | 6497   | 5.36  | 0.0000000027 | 0.0000005417 |

**Supplementary Table 2.** Comparison of gene expression using RNAseq between pineoblastoma clinical samples PB6 and PB10 with gain of *PDE4DIP*, vs pineoblastoma PB7 with concurrent gain of *PDE4DIP* and homozygous loss of *DROSHA*.

| <b>miRNA</b>    | <b>PB6</b>  | <b>PB10</b> | <b>PB7</b>  |
|-----------------|-------------|-------------|-------------|
| hsa-miR-1246    | 6.438958148 | 13.8711968  | 0.495695163 |
| hsa-miR-216b    | 9.786841364 | 11.05220801 | 0.495695163 |
| hsa-miR-182-5p  | 8.873905455 | 9.623369416 | 0.495695163 |
| hsa-miR-130b-3p | 7.8928767   | 8.642484978 | 0.495695163 |
| hsa-miR-33a-5p  | 6.357903839 | 9.050229588 | 0.495695163 |
| hsa-miR-4284    | 7.420886575 | 8.564873515 | 0.495695163 |
| hsa-miR-513b    | 8.759155834 | 4.974988112 | 0.495695163 |
| hsa-miR-508-3p  | 8.320033314 | 1.646162657 | 0.495695163 |
| hsa-miR-630     | 5.882887553 | 7.764075401 | 0.495695163 |
| hsa-miR-873-5p  | 6.450221496 | 7.048977225 | 0.495695163 |
| hsa-miR-507     | 7.525285887 | 0.298658316 | 0.495695163 |
| hsa-miR-767-5p  | 5.744161096 | 6.87835751  | 0.495695163 |
| hsa-miR-493-3p  | 6.897845456 | 7.317503062 | 0.815575429 |
| hsa-miR-513c-5p | 7.976707312 | 0.298658316 | 0.815575429 |
| hsa-miR-652-3p  | 4.801158656 | 7.465566405 | 0.815575429 |
| hsa-miR-874-5p  | 6.039577103 | 6.937462101 | 0.815575429 |
| hsa-miR-545-3p  | 5.68846014  | 7.088735246 | 0.815575429 |
| hsa-miR-137     | 7.386293635 | 0.298658316 | 0.815575429 |
| hsa-miR-1206    | 8.362163012 | 8.765965634 | 1.66448284  |
| hsa-miR-135a-5p | 3.044394119 | 8.790250739 | 1.66448284  |
| hsa-miR-375     | 3.699329526 | 8.462829424 | 1.66448284  |
| hsa-miR-219-5p  | 5.64990282  | 6.937462101 | 1.66448284  |
| hsa-miR-548b-3p | 8.172127437 | 8.578863256 | 2.195347598 |
| hsa-miR-1290    | 4.966245873 | 8.336640446 | 2.195347598 |
| hsa-miR-105-5p  | 7.251813755 | 7.911571752 | 2.582556003 |
| hsa-miR-425-5p  | 6.284662185 | 7.372168569 | 2.582556003 |
| hsa-miR-124-3p  | 12.70668379 | 13.92083572 | 2.887525271 |
| hsa-miR-488-3p  | 10.11733141 | 10.81348461 | 2.887525271 |

|                                |             |             |             |
|--------------------------------|-------------|-------------|-------------|
| hsa-miR-210                    | 5.057016965 | 7.671293372 | 2.887525271 |
| hsa-miR-216a                   | 7.172827507 | 8.411595725 | 3.137503524 |
| hsa-miR-539-5p                 | 6.897845456 | 7.372168569 | 3.351910961 |
| hsa-miR-484                    | 5.630230716 | 6.520265084 | 3.351910961 |
| hsa-miR-421                    | 8.13442632  | 9.34881666  | 3.538538164 |
| hsa-miR-204-5p                 | 9.229900306 | 7.581426574 | 3.538538164 |
| hsa-miR-454-3p                 | 6.259460816 | 7.361417467 | 3.538538164 |
| hsa-miR-1537                   | 5.086189313 | 7.455491621 | 3.538538164 |
| hsa-miR-217                    | 9.079191415 | 10.26100184 | 3.703765179 |
| hsa-miR-514a-3p                | 7.332797428 | 4.432959407 | 3.703765179 |
| hsa-miR-582-5p                 | 3.771885579 | 10.02053554 | 3.98550043  |
| hsa-miR-597                    | 5.395405605 | 7.403949364 | 4.108524457 |
| hsa-miR-181a-3p                | 6.284662185 | 8.347577079 | 4.221877081 |
| hsa-miR-628-5p                 | 6.024585638 | 8.216357854 | 4.221877081 |
| hsa-miR-301b                   | 5.549361133 | 7.475571321 | 4.326968712 |
| hsa-miR-551a                   | 6.024585638 | 6.718772592 | 4.326968712 |
| hsa-miR-135b-5p                | 13.34802129 | 7.164906927 | 4.602290585 |
| hsa-miR-769-5p                 | 9.048187133 | 9.770961155 | 4.602290585 |
| hsa-miR-642a-5p                | 7.77748547  | 3.949534933 | 4.602290585 |
| hsa-miR-491-5p                 | 6.404800964 | 6.980368105 | 4.602290585 |
| hsa-miR-324-5p                 | 9.775741953 | 11.11763012 | 4.683696454 |
| hsa-miR-500a-5p+hsa-miR-501-5p | 4.253989266 | 8.578863256 | 4.683696454 |
| hsa-miR-196a-5p                | 5.196921734 | 8.025028794 | 4.683696454 |
| hsa-miR-4443                   | 6.404800964 | 7.87418219  | 4.760753208 |
| hsa-miR-335-5p                 | 7.03815081  | 6.558420713 | 4.760753208 |
| hsa-miR-7-5p                   | 10.67053233 | 17.69230505 | 4.833396134 |
| hsa-miR-18a-5p                 | 8.470740208 | 11.97419946 | 4.833396134 |
| hsa-miR-577                    | 5.274634403 | 8.353014462 | 4.833396134 |
| hsa-miR-194-5p                 | 6.733218743 | 8.071998581 | 4.90303827  |
| hsa-miR-34c-5p                 | 9.336439612 | 9.897421961 | 4.969472865 |

|                              |             |             |             |
|------------------------------|-------------|-------------|-------------|
| hsa-miR-651                  | 5.7977912   | 9.220692711 | 4.969472865 |
| hsa-miR-221-3p               | 4.574101508 | 8.45779126  | 4.969472865 |
| hsa-miR-96-5p                | 9.818550224 | 10.69418374 | 5.032982417 |
| hsa-miR-185-5p               | 5.569855608 | 7.328585177 | 5.032982417 |
| hsa-miR-505-3p               | 5.086189313 | 8.240075769 | 5.093391153 |
| hsa-miR-149-5p               | 8.373996142 | 9.838479109 | 5.26190686  |
| hsa-miR-181b-5p+hsa-miR-181d | 7.627533884 | 9.365075712 | 5.313971371 |
| hsa-miR-532-5p               | 4.653633311 | 9.083346354 | 5.363871925 |
| hsa-miR-590-5p               | 5.506843099 | 8.416797528 | 5.363871925 |
| hsa-miR-885-5p               | 4.966245873 | 6.735657559 | 5.363871925 |
| hsa-miR-551b-3p              | 12.06460469 | 14.17264862 | 5.412442825 |
| hsa-miR-181c-5p              | 6.778340011 | 8.745405422 | 5.412442825 |
| hsa-miR-1180                 | 9.686132803 | 10.5699695  | 5.459431619 |
| hsa-miR-151a-3p              | 7.790772038 | 8.995597578 | 5.459431619 |
| hsa-miR-423-3p               | 5.249066034 | 7.435128498 | 5.504938132 |
| hsa-miR-151a-5p              | 6.568032105 | 8.821997144 | 5.591559746 |
| hsa-miR-1260a                | 6.357903839 | 7.382840144 | 5.591559746 |
| hsa-miR-887                  | 6.515699838 | 6.243745235 | 5.591559746 |
| hsa-miR-628-3p               | 6.233619677 | 7.237353386 | 5.63314055  |
| hsa-miR-183-5p               | 11.18255575 | 10.91357759 | 5.788163657 |
| hsa-miR-19a-3p               | 9.715464423 | 12.2794713  | 5.824513297 |
| hsa-miR-598                  | 10.51840728 | 11.3125143  | 5.859969548 |
| hsa-miR-197-3p               | 4.489286023 | 6.356495988 | 5.961160258 |
| hsa-miR-331-3p               | 7.186262836 | 9.307360214 | 5.993447932 |
| hsa-miR-362-3p               | 2.9202933   | 9.070201465 | 5.993447932 |
| hsa-miR-374b-5p              | 8.320033314 | 9.169173402 | 6.025028794 |
| hsa-miR-320e                 | 7.172827507 | 8.004445211 | 6.055716264 |
| hsa-miR-92a-3p               | 6.733218743 | 7.997518235 | 6.115615931 |
| hsa-miR-132-3p               | 7.530523387 | 9.253091083 | 6.173127433 |
| hsa-miR-495                  | 6.167317781 | 5.185073638 | 6.173127433 |

|                 |             |             |             |
|-----------------|-------------|-------------|-------------|
| hsa-miR-301a-3p | 10.16232838 | 12.33175391 | 6.200849575 |
| hsa-miR-379-5p  | 5.882887553 | 5.279471296 | 6.255123015 |
| hsa-miR-106b-5p | 11.65995131 | 12.81579755 | 6.307246355 |
| hsa-miR-612     | 5.7977912   | 5.451870479 | 6.332707934 |
| hsa-miR-382-5p  | 6.125981654 | 4.060047384 | 6.382321407 |
| hsa-miR-299-3p  | 6.38145643  | 7.796429035 | 6.406502657 |
| hsa-miR-186-5p  | 8.848716822 | 9.471492326 | 6.430117975 |
| hsa-miR-146a-5p | 5.027242536 | 7.990501111 | 6.430117975 |
| hsa-miR-455-5p  | 5.762083004 | 10.19433826 | 6.476543706 |
| hsa-miR-660-5p  | 3.454175893 | 9.838479109 | 6.476543706 |
| hsa-miR-9-5p    | 11.79357893 | 13.82824163 | 6.499208091 |
| hsa-miR-193b-3p | 6.769375049 | 8.416797528 | 6.564987801 |
| hsa-miR-518b    | 5.196921734 | 6.171727244 | 6.648321627 |
| hsa-miR-664-3p  | 9.360408175 | 9.544674706 | 6.746178381 |
| hsa-miR-363-3p  | 6.588414824 | 6.863195112 | 6.855491443 |
| hsa-miR-30a-3p  | 3.971773447 | 5.410748128 | 6.872951851 |
| hsa-miR-195-5p  | 4.934516502 | 4.589164237 | 6.940636607 |
| hsa-miR-340-5p  | 10.49964661 | 12.28304204 | 7.097084016 |
| hsa-miR-361-3p  | 7.988287039 | 9.682924378 | 7.111865964 |
| hsa-miR-362-5p  | 4.653633311 | 10.20791725 | 7.12649799  |
| hsa-miR-128     | 6.787249608 | 9.793148077 | 7.169423979 |
| hsa-miR-574-3p  | 2.63691458  | 2.485426827 | 7.329572126 |
| hsa-miR-190a    | 8.718019065 | 10.96691636 | 7.354557947 |
| hsa-miR-296-5p  | 8.063179335 | 9.708635594 | 7.354557947 |
| hsa-miR-30c-5p  | 6.416333089 | 8.849217421 | 7.37920506  |
| hsa-miR-30e-3p  | 6.648033951 | 8.887220615 | 7.462134139 |
| hsa-miR-423-5p  | 8.933041444 | 10.6931123  | 7.529664802 |
| hsa-miR-148b-3p | 9.840006812 | 11.18479478 | 7.58360934  |
| hsa-miR-19b-3p  | 10.99913328 | 13.09554867 | 7.615004242 |
| hsa-miR-24-3p   | 6.667466405 | 7.350585645 | 7.68580002  |

|                               |             |             |             |
|-------------------------------|-------------|-------------|-------------|
| hsa-miR-376a-3p               | 7.718430129 | 6.399171094 | 7.695645899 |
| hsa-miR-10b-5p                | 6.404800964 | 6.33467553  | 7.73430317  |
| hsa-miR-107                   | 9.793457    | 11.77470059 | 7.826612041 |
| hsa-miR-32-5p                 | 9.458037433 | 12.23262478 | 7.844423317 |
| hsa-miR-30e-5p                | 9.113090983 | 10.52728151 | 7.862017377 |
| hsa-miR-127-3p                | 8.014968933 | 7.747655933 | 7.879338185 |
| hsa-miR-136-5p                | 7.577353292 | 6.701826258 | 7.879338185 |
| hsa-miR-361-5p                | 9.147942623 | 10.80755618 | 7.921840937 |
| hsa-miR-106a-5p+hsa-miR-17-5p | 12.32005024 | 13.89972133 | 7.930205098 |
| hsa-miR-99b-5p                | 8.338246117 | 10.82626246 | 7.938521046 |
| hsa-miR-20a-5p+hsa-miR-20b-5p | 12.21224102 | 13.82860758 | 7.94673086  |
| hsa-miR-223-3p                | 7.131651214 | 8.814101754 | 7.971256136 |
| hsa-miR-133b                  | 3.158660175 | 3.215678597 | 8.003264909 |
| hsa-miR-208b                  | 2.786596362 | 3.698218478 | 8.018979052 |
| hsa-miR-133a-5p               | 0           | 0.298658316 | 8.018979052 |
| hsa-miR-222-3p                | 6.568032105 | 11.50816617 | 8.110039536 |
| hsa-miR-93-5p                 | 13.39935003 | 15.43874313 | 8.19564288  |
| hsa-miR-140-5p                | 9.493695363 | 11.1248063  | 8.202564648 |
| hsa-miR-486-3p                | 0           | 6.42004442  | 8.269921462 |
| hsa-miR-218-5p                | 13.34286082 | 9.208746467 | 8.340517763 |
| hsa-let-7e-5p                 | 10.39258576 | 10.75712328 | 8.413839452 |
| hsa-miR-342-3p                | 9.793457    | 11.60258753 | 8.50608935  |
| hsa-miR-125a-5p               | 9.316666199 | 10.27397039 | 8.560905977 |
| hsa-miR-30b-5p                | 8.228578221 | 9.586877309 | 8.733083132 |
| hsa-miR-503                   | 5.882887553 | 7.237353386 | 8.80293635  |
| hsa-miR-499a-5p               | 5.057016965 | 7.114575251 | 8.843292973 |
| hsa-miR-30a-5p                | 8.148273192 | 9.340629026 | 8.86090074  |
| hsa-miR-497-5p                | 6.13996057  | 6.312519967 | 8.9863256   |
| hsa-miR-21-5p                 | 10.83777771 | 11.27286302 | 9.265779113 |
| hsa-miR-450a-5p               | 6.153602696 | 8.981595822 | 9.31124879  |

|                 |             |             |             |
|-----------------|-------------|-------------|-------------|
| hsa-miR-365a-3p | 7.799605422 | 8.411595725 | 9.333468459 |
| hsa-miR-34a-5p  | 8.286003217 | 12.25569546 | 9.352220026 |
| hsa-miR-28-5p   | 6.297191417 | 9.32685639  | 9.352220026 |
| hsa-miR-142-3p  | 9.533757999 | 10.59889925 | 9.416058577 |
| hsa-miR-4286    | 10.18347411 | 10.60346872 | 9.448384785 |
| hsa-miR-148a-3p | 10.98859949 | 10.08410414 | 9.581596045 |
| hsa-miR-30d-5p  | 10.66513158 | 11.93481502 | 9.589520072 |
| hsa-miR-15b-5p  | 10.52107037 | 13.92300986 | 9.666525827 |
| hsa-miR-145-5p  | 6.416333089 | 7.260778432 | 9.734845078 |
| hsa-miR-27b-3p  | 8.923000576 | 9.530347809 | 9.739611864 |
| hsa-miR-25-3p   | 13.31917251 | 16.43338283 | 9.90550735  |
| hsa-miR-130a-3p | 11.42057082 | 11.2850149  | 9.928607199 |
| hsa-miR-98      | 11.82082516 | 10.195852   | 9.981809851 |
| hsa-miR-191-5p  | 13.05244918 | 13.65025745 | 9.997786358 |
| hsa-miR-100-5p  | 8.344251517 | 9.801142485 | 10.02338012 |
| hsa-miR-26b-5p  | 10.10141108 | 10.17756903 | 10.05617706 |
| hsa-miR-199a-5p | 7.617651119 | 7.514990142 | 10.10310418 |
| hsa-miR-144-3p  | 8.155121802 | 12.24072277 | 10.16279412 |
| hsa-let-7f-5p   | 8.581953751 | 8.810153867 | 10.23197714 |
| hsa-miR-374a-5p | 11.4322809  | 12.58345656 | 10.2520977  |
| hsa-miR-29c-3p  | 7.283458821 | 9.481476555 | 10.40372574 |
| hsa-miR-424-5p  | 6.914086097 | 9.930559946 | 10.49662413 |
| hsa-miR-23b-3p  | 10.25712851 | 10.29674417 | 10.52170839 |
| hsa-miR-26a-5p  | 10.02288099 | 10.18673329 | 10.62435682 |
| hsa-miR-16-5p   | 9.907656824 | 13.18276522 | 10.87527324 |
| hsa-miR-95      | 6.813524689 | 8.369248353 | 10.89353665 |
| hsa-miR-15a-5p  | 10.83671315 | 13.41745435 | 10.91998804 |
| hsa-miR-150-5p  | 6.369815424 | 6.33467553  | 11.05020237 |
| hsa-miR-181a-5p | 13.68377539 | 15.11381785 | 11.28563918 |
| hsa-let-7i-5p   | 10.90857276 | 10.73332044 | 11.29536717 |



|                                 |             |             |             |
|---------------------------------|-------------|-------------|-------------|
| hsa-miR-378g                    | 6.75141016  | 8.633576519 | 11.40803247 |
| hsa-miR-99a-5p                  | 8.451334766 | 8.401092837 | 11.41771541 |
| hsa-miR-29a-3p                  | 10.48881423 | 10.01023436 | 11.66729342 |
| hsa-miR-199b-5p                 | 7.676098121 | 7.804389199 | 11.68467412 |
| hsa-miR-378a-3p+hsa-miR-378i    | 7.420886575 | 8.872120779 | 11.88698446 |
| hsa-miR-22-3p                   | 9.29041058  | 10.48452083 | 11.97790238 |
| hsa-let-7c                      | 10.74922418 | 8.872120779 | 12.01763315 |
| hsa-let-7d-5p                   | 11.65360197 | 10.52728151 | 12.12064937 |
| hsa-let-7g-5p                   | 13.21612743 | 12.68352102 | 12.15757115 |
| hsa-miR-126-3p                  | 10.43198852 | 11.98036811 | 12.82220234 |
| hsa-miR-125b-5p                 | 9.758939387 | 9.844297767 | 13.22864285 |
| hsa-miR-4454                    | 17.57406587 | 18.03239388 | 13.56093343 |
| hsa-miR-199a-3p+hsa-miR-199b-3p | 10.53100124 | 11.01320401 | 13.56110175 |
| hsa-miR-29b-3p                  | 10.49559524 | 10.82037844 | 13.72080964 |
| hsa-let-7b-5p                   | 13.12441376 | 11.10961521 | 13.90553085 |
| hsa-miR-133a                    | 4.352617299 | 5.840714991 | 13.96719473 |
| hsa-miR-23a-3p                  | 10.66753737 | 11.46671378 | 14.15091503 |
| hsa-miR-451a                    | 12.27170229 | 15.56261808 | 14.41336745 |
| hsa-let-7a-5p                   | 14.99004367 | 14.83144135 | 15.11860898 |
| hsa-miR-206                     | 8.566586861 | 3.3950628   | 15.15891732 |
| hsa-miR-1                       | 5.249066034 | 7.524659241 | 16.14050049 |

**Supplementary Table 3.** miRNA quantification in pineoblastoma tumor samples PB6 and PB10 with gain of *PDE4DIP*, vs pineoblastoma PB7 with concurrent gain of *PDE4DIP* and homozygous loss of *DROSHA*. Samples were analyzed using the default quality control measures, and counts were normalized to ligation controls in the Nanostring codesets.

|                                 | <b>Drosha-1</b> | <b>Drosha-2</b> | <b>Drosha-3</b> | <b>WT-1</b> | <b>WT-2</b> | <b>WT-3</b> |
|---------------------------------|-----------------|-----------------|-----------------|-------------|-------------|-------------|
| hsa-miR-571                     | 2.38            | 2.94            | 2.86            | 0.00        | 0.32        | 0.00        |
| hsa-miR-487a                    | 0.00            | 0.03            | 0.60            | 1.69        | 1.90        | 2.42        |
| hsa-miR-499b-3p                 | 0.00            | 0.03            | 0.60            | 2.01        | 3.12        | 2.42        |
| hsa-miR-485-3p                  | 0.00            | 0.03            | 0.60            | 3.26        | 3.64        | 2.63        |
| hsa-miR-548l                    | 0.00            | 0.03            | 0.60            | 2.49        | 2.90        | 3.40        |
| hsa-miR-195-5p                  | 0.00            | 0.03            | 0.60            | 2.85        | 2.64        | 3.51        |
| hsa-miR-885-5p                  | 0.00            | 0.03            | 0.60            | 4.14        | 4.32        | 3.51        |
| hsa-miR-1285-5p                 | 2.38            | 2.20            | 2.52            | 3.26        | 3.12        | 3.62        |
| hsa-miR-206                     | 0.00            | 0.03            | 1.44            | 2.68        | 4.13        | 3.72        |
| hsa-miR-214-3p                  | 0.00            | 0.03            | 0.60            | 3.85        | 3.64        | 3.72        |
| hsa-miR-337-5p                  | 0.79            | 0.03            | 0.60            | 3.26        | 4.96        | 3.90        |
| hsa-miR-210                     | 1.37            | 0.03            | 0.60            | 3.77        | 3.12        | 4.13        |
| hsa-miR-126-3p                  | 0.00            | 0.03            | 1.44            | 4.26        | 5.18        | 4.13        |
| hsa-miR-145-5p                  | 0.00            | 0.03            | 0.60            | 5.10        | 5.71        | 4.20        |
| hsa-miR-1323                    | 2.11            | 1.36            | 0.60            | 3.77        | 4.71        | 4.27        |
| hsa-miR-545-3p                  | 1.79            | 1.36            | 0.60            | 3.93        | 3.49        | 4.39        |
| hsa-miR-542-3p                  | 1.37            | 1.84            | 0.60            | 3.49        | 3.90        | 4.39        |
| hsa-miR-194-5p                  | 1.37            | 1.36            | 0.60            | 3.26        | 3.64        | 4.61        |
| hsa-miR-499a-3p                 | 1.79            | 0.03            | 0.60            | 4.07        | 4.57        | 4.85        |
| hsa-miR-10b-5p                  | 0.00            | 0.63            | 0.60            | 5.04        | 6.34        | 5.19        |
| hsa-miR-4536-5p                 | 3.49            | 3.67            | 2.52            | 5.10        | 5.99        | 5.41        |
| hsa-miR-299-3p                  | 2.60            | 2.49            | 1.44            | 5.46        | 6.95        | 5.63        |
| hsa-miR-504                     | 1.79            | 0.03            | 0.60            | 4.38        | 4.23        | 5.66        |
| hsa-miR-5196-3p+hsa-miR-6732-3p | 0.00            | 2.20            | 0.60            | 6.38        | 7.98        | 5.66        |
| hsa-miR-181c-5p                 | 3.25            | 3.55            | 2.86            | 4.85        | 5.49        | 5.80        |
| hsa-miR-664-3p                  | 3.49            | 3.67            | 3.13            | 4.96        | 5.49        | 5.82        |
| hsa-miR-34c-5p                  | 1.79            | 0.03            | 0.60            | 4.32        | 4.32        | 5.86        |
| hsa-miR-592                     | 2.79            | 2.20            | 3.13            | 4.96        | 5.81        | 6.01        |

|                              |      |      |      |      |       |      |
|------------------------------|------|------|------|------|-------|------|
| hsa-miR-216b                 | 0.79 | 1.36 | 0.60 | 5.26 | 5.88  | 6.05 |
| hsa-miR-148a-3p              | 4.31 | 3.89 | 3.56 | 5.48 | 6.02  | 6.12 |
| hsa-miR-548h-5p              | 0.00 | 0.03 | 0.60 | 4.20 | 5.32  | 6.16 |
| hsa-miR-362-3p               | 1.37 | 1.36 | 0.60 | 5.76 | 5.37  | 6.58 |
| hsa-miR-483-3p               | 2.38 | 0.03 | 0.60 | 6.23 | 7.22  | 6.64 |
| hsa-miR-26b-5p               | 3.79 | 4.31 | 3.73 | 6.17 | 6.37  | 6.85 |
| hsa-miR-455-3p               | 3.49 | 4.07 | 4.38 | 5.79 | 6.97  | 6.86 |
| hsa-miR-548n                 | 4.25 | 3.79 | 3.13 | 6.39 | 7.20  | 6.97 |
| hsa-miR-30c-5p               | 2.11 | 1.84 | 0.60 | 6.07 | 6.70  | 7.00 |
| hsa-miR-365a-3p              | 3.11 | 3.79 | 3.73 | 6.60 | 7.08  | 7.17 |
| hsa-miR-582-5p               | 3.60 | 4.07 | 3.36 | 6.39 | 6.61  | 7.21 |
| hsa-miR-362-5p               | 4.11 | 3.55 | 4.03 | 6.12 | 6.32  | 7.22 |
| hsa-miR-503                  | 4.65 | 4.76 | 5.40 | 6.34 | 7.09  | 7.23 |
| hsa-miR-423-3p               | 4.55 | 4.86 | 4.75 | 6.73 | 6.97  | 7.43 |
| hsa-miR-30a-3p               | 5.00 | 5.22 | 4.83 | 6.89 | 7.23  | 7.70 |
| hsa-miR-30a-5p               | 4.11 | 5.26 | 4.28 | 6.51 | 6.83  | 7.80 |
| hsa-miR-342-3p               | 4.60 | 4.70 | 5.29 | 7.04 | 7.55  | 7.96 |
| hsa-miR-95                   | 4.43 | 5.40 | 5.04 | 6.91 | 7.26  | 8.01 |
| hsa-miR-92a-3p               | 5.57 | 5.63 | 5.40 | 7.51 | 8.12  | 8.09 |
| hsa-miR-181b-5p+hsa-miR-181d | 5.04 | 5.77 | 5.84 | 7.26 | 7.54  | 8.17 |
| hsa-miR-423-5p               | 6.36 | 6.61 | 5.91 | 7.81 | 8.46  | 8.18 |
| hsa-miR-548aa                | 0.00 | 0.03 | 0.60 | 6.51 | 7.51  | 8.35 |
| hsa-miR-221-3p               | 6.22 | 6.04 | 5.23 | 7.81 | 8.28  | 8.82 |
| hsa-miR-100-5p               | 5.43 | 6.06 | 5.54 | 8.09 | 8.75  | 8.90 |
| hsa-miR-106b-5p              | 5.62 | 6.53 | 5.63 | 7.89 | 8.06  | 8.92 |
| hsa-miR-361-5p               | 5.31 | 6.15 | 5.68 | 7.81 | 7.95  | 9.01 |
| hsa-miR-148b-3p              | 6.17 | 6.43 | 5.68 | 8.14 | 8.25  | 9.01 |
| hsa-miR-450a-5p              | 5.28 | 6.30 | 5.76 | 7.98 | 8.83  | 9.04 |
| hsa-miR-34a-5p               | 6.02 | 6.54 | 5.50 | 7.97 | 8.46  | 9.35 |
| hsa-miR-26a-5p               | 6.27 | 6.76 | 6.32 | 9.21 | 10.13 | 9.41 |

|                                 |       |       |       |       |       |       |
|---------------------------------|-------|-------|-------|-------|-------|-------|
| hsa-miR-199a-3p+hsa-miR-199b-3p | 3.60  | 4.31  | 4.67  | 9.25  | 9.81  | 9.70  |
| hsa-miR-21-5p                   | 6.23  | 6.51  | 6.32  | 8.84  | 9.31  | 9.92  |
| hsa-miR-92b-3p                  | 8.06  | 7.75  | 7.55  | 9.32  | 9.83  | 9.96  |
| hsa-miR-19b-3p                  | 6.13  | 6.79  | 6.40  | 8.60  | 9.45  | 9.98  |
| hsa-let-7f-5p                   | 6.60  | 6.43  | 5.91  | 10.08 | 10.69 | 10.02 |
| hsa-miR-29b-3p                  | 7.62  | 7.76  | 7.38  | 9.19  | 9.86  | 10.13 |
| hsa-miR-20a-5p+hsa-miR-20b-5p   | 6.81  | 7.65  | 7.64  | 9.02  | 9.64  | 10.28 |
| hsa-miR-340-5p                  | 6.50  | 7.43  | 7.34  | 9.27  | 9.89  | 10.34 |
| hsa-miR-106a-5p+hsa-miR-17-5p   | 7.52  | 8.13  | 8.35  | 9.53  | 10.15 | 10.48 |
| hsa-miR-99b-5p                  | 7.27  | 8.03  | 7.49  | 9.50  | 9.67  | 10.52 |
| hsa-let-7e-5p                   | 7.49  | 8.11  | 7.67  | 9.83  | 10.12 | 10.57 |
| hsa-miR-98                      | 7.80  | 8.14  | 8.23  | 10.38 | 11.11 | 11.15 |
| hsa-miR-374a-5p                 | 7.23  | 7.91  | 8.14  | 9.85  | 10.24 | 11.30 |
| hsa-miR-191-5p                  | 8.06  | 8.85  | 8.34  | 10.24 | 10.55 | 11.37 |
| hsa-miR-23a-3p                  | 8.02  | 8.41  | 8.18  | 10.35 | 10.83 | 11.51 |
| hsa-miR-25-3p                   | 8.23  | 8.74  | 8.79  | 10.84 | 11.32 | 11.85 |
| hsa-miR-16-5p                   | 8.49  | 9.21  | 8.94  | 10.73 | 11.82 | 11.95 |
| hsa-miR-181a-5p                 | 9.44  | 10.00 | 9.60  | 11.38 | 11.85 | 12.13 |
| hsa-let-7g-5p                   | 8.89  | 9.27  | 9.10  | 11.49 | 12.04 | 12.18 |
| hsa-let-7d-5p                   | 8.68  | 9.04  | 8.58  | 11.30 | 11.75 | 12.25 |
| hsa-miR-99a-5p                  | 9.30  | 9.78  | 9.53  | 12.09 | 12.58 | 12.86 |
| hsa-let-7b-5p                   | 9.81  | 9.77  | 9.07  | 12.41 | 12.91 | 12.90 |
| hsa-let-7c                      | 10.39 | 10.68 | 10.11 | 12.72 | 13.25 | 13.36 |
| hsa-let-7i-5p                   | 10.99 | 11.20 | 10.98 | 13.27 | 13.96 | 13.85 |
| hsa-miR-125b-5p                 | 10.56 | 11.10 | 10.28 | 13.30 | 13.79 | 14.22 |
| hsa-let-7a-5p                   | 11.41 | 11.57 | 11.33 | 13.87 | 14.23 | 14.60 |
| hsa-miR-9-5p                    | 11.35 | 11.81 | 11.15 | 14.05 | 14.23 | 15.35 |

**Supplementary Table 4.** miRNA quantification in hNSC lines with induced *DROSHA* aberration vs. control lines. Samples were analyzed using the default quality control measures, and counts were normalized to ligation controls in the Nanostring codesets.

| <b>Summary of Clinical Data</b> |                              |            |
|---------------------------------|------------------------------|------------|
| <b>Age</b>                      | All Patients: median (range) | 11 (1–69)  |
|                                 | Adult: (N=3, 18%)            | 45 (37-69) |
|                                 | Pediatric: (N=13, 82%)       | 8 (1–17)   |
| <b>Sex</b>                      | Male                         | 4 (29%)    |
|                                 | Female                       | 12 (71%)   |
| <b>Treatment</b>                | Including Radiation Therapy  | 16 (100%)  |
| <b>Overall Survival (years)</b> | Median (range)               | 4.0 (1–7)  |

**Supplementary Table 5.** Demographic and clinical features of the pineoblastoma patient cohort. For most patients, very limited clinical data were available.

| Gene       | Confirmed in Samples       | Chr:Pos         | Tumor Variant Allele Frequency [%] | Coverage | Original Discovery Genome/Exome |
|------------|----------------------------|-----------------|------------------------------------|----------|---------------------------------|
| ABCA2      | PB1-M2                     | chr9:139906196  | 48                                 | 776      | Genome                          |
| ABCD2      | PB1-M2                     | chr12:39947853  | 25                                 | 957      | Genome                          |
| ACOT6      | <b>PB1-M1, M2, M3</b>      | chr14:74086210  | 21                                 | 784      | Genome                          |
| AGO3       | PB8                        | chr1:36474628   | 14                                 | 389      | Exome                           |
| ALPK2      | PB1-M2                     | chr18:56204733  | 24                                 | 1078     | Genome                          |
| ARRB2      | PB6                        | chr17:4619833   | 14                                 | 594      | Exome                           |
| ARRB2      | PB14                       | chr17:4619841   | 31                                 | 594      | Exome                           |
| ASTL       | PB1-M2                     | chr2:96789755   | 27                                 | 700      | Genome                          |
| BDP1       | PB1-M2                     | chr5:70818287   | 33                                 | 574      | Genome                          |
| C12orf51   | PB1-M3                     | chr12:112600261 | 5                                  | 743      | Genome                          |
| C5orf42    | PB1-M2                     | chr5:37125473   | 13                                 | 625      | Genome                          |
| CAPN1      | PB6                        | chr11:64974057  | 49                                 | 579      | Exome                           |
| CAPN1      | PB14                       | chr11:64974057  | 43                                 | 708      | Exome                           |
| CHD8       | PB8                        | chr14:21868380  | 66                                 | 524      | Exome                           |
| COL2A1     | <b>PB1, PB1-M1, M2, M3</b> | chr12:48371414  | 22                                 | 1766     | Genome                          |
| CREBBP     | PB8                        | chr16:3824628   | 61                                 | 271      | Exome                           |
| CSMD2      | PB1-M3                     | chr1:34090148   | 4                                  | 768      | Genome                          |
| CYP4F2     | PB1-M2                     | chr19:15989696  | 23                                 | 824      | Genome                          |
| CYSLTR1    | PB1                        | chrX:77529219   | 16                                 | 281      | Genome                          |
| DCHS2      | <b>PB1-M1, M2, M3</b>      | chr4:155157705  | 23                                 | 736      | Genome                          |
| DNAH6      | PB1-M2                     | chr2:85024768   | 27                                 | 673      | Genome                          |
| ELN        | <b>PB1-M1, M3</b>          | chr7:73482996   | 19                                 | 749      | Genome                          |
| ENPP2      | PB1-M2                     | chr8:120581606  | 39                                 | 1120     | Genome                          |
| FBN1       | PB1                        | chr15:48760623  | 15                                 | 1515     | Genome                          |
| GPAT2      | PB1                        | chr2:96688929   | 38                                 | 1641     | Genome                          |
| GPX5       | <b>PB1, PB1-M1, M2, M3</b> | chr6:28500155   | 49                                 | 1248     | Genome                          |
| HBS1L      | PB1-M3                     | chr6:135318704  | 9                                  | 616      | Genome                          |
| KCNA5      | PB1-M2                     | chr12:5153668   | 22                                 | 951      | Genome                          |
| KCNN4      | PB1                        | chr19:44273150  | 30                                 | 655      | Genome                          |
| KRTAP4-4   | PB1-M2                     | chr17:39316742  | 24                                 | 234      | Genome                          |
| LIG1       | PB1                        | chr19:48626437  | 3                                  | 1442     | Genome                          |
| LY75-CD302 | PB1-M2                     | chr2:160711423  | 27                                 | 848      | Genome                          |
| MAP2K7     | PB6                        | chr19:7975205   | 27                                 | 635      | Exome                           |
| MAP2K7     | PB14                       | chr19:7975205   | 46                                 | 743      | Exome                           |
| MGLL       | <b>PB1, PB1-M1, M2, M3</b> | chr3:127500677  | 46                                 | 1507     | Genome                          |
| MYH3       | PB1-M1, M3                 | chr17:10546195  | 13                                 | 518      | Genome                          |
| MYO3A      | PB1-M2                     | chr10:26446420  | 17                                 | 1145     | Genome                          |
| NBPF14     | PB1-M1                     | chr1:148023637  | 6                                  | 1281     | Genome                          |
| NBPF14     | PB6                        | chr1:148346633  | 19                                 | 586      | Exome                           |
| NBPF14     | PB14                       | chr1:148346633  | 17                                 | 567      | Exome                           |
| OR1D5      | PB1                        | chr17:2966549   | 27                                 | 1032     | Genome                          |
| OR52H1     | PB1                        | chr11:5566168   | 12                                 | 1251     | Genome                          |
| POU1F1     | PB1-M2                     | chr3:87309234   | 27                                 | 851      | Genome                          |
| POU6F1     | PB1-M2                     | chr12:51586169  | 23                                 | 991      | Genome                          |
| PRAMEF11   | <b>PB1, PB1-M2</b>         | chr1:12887174   | 6                                  | 1946     | Genome                          |
| PTK2B      | <b>PB1, PB1-M1, M3</b>     | chr8:27293840   | 19                                 | 2047     | Genome                          |
| RASA3      | PB1                        | chr13:114774873 | 14                                 | 1666     | Genome                          |
| RDBP       | <b>PB1-M1, M2</b>          | chr6:31922412   | 4                                  | 706      | Genome                          |
| RDH16      | PB1-M2                     | chr12:57351022  | 19                                 | 832      | Genome                          |
| SALL3      | PB1                        | chr18:76753708  | 11                                 | 1244     | Genome                          |
| SETD8      | PB1                        | chr12:123879768 | 9                                  | 693      | Genome                          |
| SLC38A10   | PB1-M2                     | chr17:79226009  | 9                                  | 1010     | Genome                          |
| SREBF2     | PB6                        | chr22:42276793  | 48                                 | 645      | Exome                           |
| SREBF2     | PB14                       | chr22:42276793  | 48                                 | 702      | Exome                           |

|         |                        |                |    |      |        |
|---------|------------------------|----------------|----|------|--------|
| TET1    | <b>PB1-M1</b> , M2, M3 | chr10:70442651 | 25 | 584  | Genome |
| TNN     | PB14                   | chr1:175116071 | 9  | 794  | Exome  |
| TTN     | PB1-M2                 | chr2:179440017 | 28 | 882  | Genome |
| TXLNA   | PB1-M2                 | chr1:32655708  | 22 | 959  | Genome |
| ZDHHC11 | PB1-M1                 | chr5:833915    | 23 | 747  | Genome |
| ZNF292  | PB1-M3                 | chr6:87970549  | 10 | 559  | Genome |
| ZNF583  | PB1-M2                 | chr19:56934295 | 24 | 1019 | Genome |
| ZNF789  | <b>PB1-M1</b> , M2, M3 | chr7:99085019  | 22 | 737  | Genome |
| ZNF8    | PB1-M2                 | chr19:58805617 | 22 | 1107 | Genome |

**Supplementary Table 6.** Coverage and VAF frequency of confirmed mutations in WES and WGS samples. Variants identified in 8 pineoblastoma samples, where sufficient DNA material was available, were validated on MiSeq platform. Where a mutation was confirmed in several samples from the same patient, coverage and VAF are shown only for the sample in **bold**.
